## REGULATION OF INOSITOL 1,4,5-TRISPHOSPHATE RECEPTORS

IAN C. B. MARSHALL AND COLIN W. TAYLOR

*Department of Pharmacology, Tennis Court Road, Cambridge CB2 1QJ*

### Summary

Inositol 1,4,5-trisphosphate [ $\text{Ins}(1,4,5)\text{P}_3$ ] is a soluble second messenger responsible for the generation of highly organized  $\text{Ca}^{2+}$  signals in a variety of cell types. These  $\text{Ca}^{2+}$  signals control many cellular responses, including cell growth, fertilization, smooth muscle contraction and secretion.  $\text{Ins}(1,4,5)\text{P}_3$  is produced at the plasma membrane following receptor activation, but rapidly diffuses into the cytosol, where it binds to specific receptors through which it mobilizes intracellular  $\text{Ca}^{2+}$  stores. The actions of  $\text{Ins}(1,4,5)\text{P}_3$  within cells are tightly controlled: enzymes control the rapid generation and metabolism of  $\text{Ins}(1,4,5)\text{P}_3$  following receptor activation; multiple  $\text{Ins}(1,4,5)\text{P}_3$  receptor subtypes and splice variants exist, some of which are differentially expressed between cell types and at different stages of development; and  $\text{Ins}(1,4,5)\text{P}_3$  receptors are the targets for a number of allosteric regulators, including protein kinases, ATP and divalent cations. Understanding how cells control the  $\text{Ca}^{2+}$ -mobilizing activity of  $\text{Ins}(1,4,5)\text{P}_3$  will be important if we are to unravel the mechanisms that underlie the complex arrangements of  $\text{Ca}^{2+}$  signals.

### Introduction

Cellular responses as diverse as fertilization, cell growth and development, secretion, muscle contraction, sensory perception and neuromodulation depend critically on elevations in intracellular  $\text{Ca}^{2+}$  concentration ( $[\text{Ca}^{2+}]_i$ ) (Berridge, 1993). The introduction of sophisticated imaging techniques has revealed astonishing complexities in the temporal and spatial characteristics of these  $\text{Ca}^{2+}$  elevations in single cells (see review by Cheek and Barry, 1993). Repetitive, transient elevations in intracellular  $[\text{Ca}^{2+}]$  ( $\text{Ca}^{2+}$  spikes or oscillations) have been recorded in a number of cell types (see review by Thorn, 1993); these can be arranged spatially as repetitive  $\text{Ca}^{2+}$  waves originating from a specific point within the cytosol (see review by Gillot and Whitaker, 1993), or even as regenerative  $\text{Ca}^{2+}$  spirals (Lechleiter *et al.* 1991).

Whilst the organization of these signals has been extensively characterized, a more difficult problem has been to establish their physiological significance. A recurring criticism is that the techniques employed to measure  $\text{Ca}^{2+}$  signals, such as the incorporation of Fura-2, a mobile  $\text{Ca}^{2+}$  buffer and fluorescent  $\text{Ca}^{2+}$ -indicator dye, into the cytosol may themselves contribute to the complex spatial organization. A few examples have been reported, however, in which oscillatory  $\text{Ca}^{2+}$  signals correlate with periodic cellular

responses. In monolayers of ciliated airway epithelia,  $\text{Ca}^{2+}$  waves that propagate across, and between, cells correlate with waves of increased beating-frequency of cilia (Sanderson *et al.* 1990), a response which may be important for the removal of foreign objects from the airways. In rat gonadotrophs,  $\text{Ca}^{2+}$  oscillations have been shown to correlate with periodic elevations in membrane capacitance, reflecting exocytotic vesicle fusion (Tse *et al.* 1993).

Rises in intracellular  $\text{Ca}^{2+}$  concentration are generated by a combination of the release of stored  $\text{Ca}^{2+}$  from organelles and the stimulation of  $\text{Ca}^{2+}$  influx across the plasma membrane, although the relative contributions from these two sources of  $\text{Ca}^{2+}$  varies between tissues. In skeletal and cardiac muscle, for example,  $\text{Ca}^{2+}$  is stored in the sarcoplasmic reticulum (SR) from which it is released through ryanodine-sensitive  $\text{Ca}^{2+}$  channels (ryanodine receptors, RyRs) following depolarization of T-tubules: however, whilst skeletal muscle RyRs are activated directly by voltage-sensing dihydropyridine receptors in the T-tubular membrane, release of  $\text{Ca}^{2+}$  through cardiac muscle RyRs is triggered by the  $\text{Ca}^{2+}$  that enters the cells in response to depolarization (reviewed by Sorrentino and Volpe, 1993).

In many cell types, intracellular  $\text{Ca}^{2+}$  stores are mobilized by the soluble second messenger inositol 1,4,5-trisphosphate [ $\text{Ins}(1,4,5)\text{P}_3$ ].  $\text{Ins}(1,4,5)\text{P}_3$  is produced at the plasma membrane following receptor activation and mobilizes  $\text{Ca}^{2+}$  through specific receptors that are structurally similar to the RyRs of skeletal and cardiac muscle (Berridge and Irvine, 1984, 1989); the depletion of the  $\text{Ca}^{2+}$  stores by  $\text{Ins}(1,4,5)\text{P}_3$  is thought to provide a signal for  $\text{Ca}^{2+}$  influx across the plasma membrane (Putney, 1986). Initially,  $\text{Ins}(1,4,5)\text{P}_3$  was proposed to provide only the initial trigger for the onset of  $\text{Ca}^{2+}$  responses (Oron *et al.* 1985; Parker and Miledi, 1986; Berridge and Galione, 1988), but growing evidence now supports a role for  $\text{Ins}(1,4,5)\text{P}_3$  in the temporal and spatial organization of  $\text{Ca}^{2+}$  signals (Harootunian *et al.* 1991; DeLisle and Welsh, 1992; Miyazaki *et al.* 1992) and possibly even a direct role in the stimulation of  $\text{Ca}^{2+}$  influx across the plasma membrane (Irvine, 1991). Indeed, with the identification of multiple  $\text{Ins}(1,4,5)\text{P}_3$  receptor subtypes, and the growing number of cytosolic factors known to regulate these receptors allosterically, it is likely that the control of  $\text{Ins}(1,4,5)\text{P}_3$ -stimulated  $\text{Ca}^{2+}$  mobilization is important in contributing to the organization and diversity of  $\text{Ca}^{2+}$  signals.

### Generation and metabolism of $\text{Ins}(1,4,5)\text{P}_3$

$\text{Ins}(1,4,5)\text{P}_3$  levels within cells peak during the first few seconds of agonist stimulation, after which they are rapidly reduced either to basal levels or, in the continued presence of agonist, to a slightly elevated plateau. These rapid, transient changes in  $\text{Ins}(1,4,5)\text{P}_3$  concentration result from the competing metabolic pathways associated with  $\text{Ins}(1,4,5)\text{P}_3$  generation and  $\text{Ins}(1,4,5)\text{P}_3$  metabolism.

#### *Ins(1,4,5)P<sub>3</sub> generation*

$\text{Ins}(1,4,5)\text{P}_3$  is generated in cells by the receptor-mediated activation of certain phospholipase C (PLC) isoforms (Fig. 1). Two classes of cell-surface receptor are involved. Receptors coupled to GTP-binding (G) proteins of the  $\text{G}_q$  family undergo a conformational change following agonist binding which allows them to interact with, and

activate, the G-protein. An active subunit of the G-protein stimulates PLC-β. Receptors with intrinsic tyrosine kinase activity dimerize in response to agonist stimulation: the dimers phosphorylate each other on tyrosine residues within the cytosolic domains of the receptors, and these phosphotyrosine residues provide a site to which PLC-γ binds and becomes activated. Both PLC-β and PLC-γ hydrolyse the membrane-associated lipid, phosphatidylinositol 4,5-bisphosphate, to produce 1,2-diacylglycerol and Ins(1,4,5)P<sub>3</sub>. 1,2-Diacylglycerol remains in the plasma membrane where it activates proteins kinase C (Nishizuka, 1988), whereas Ins(1,4,5)P<sub>3</sub> diffuses into the cytosol and binds to specific receptors through which it mobilizes intracellular Ca<sup>2+</sup> stores (Taylor and Richardson, 1991).

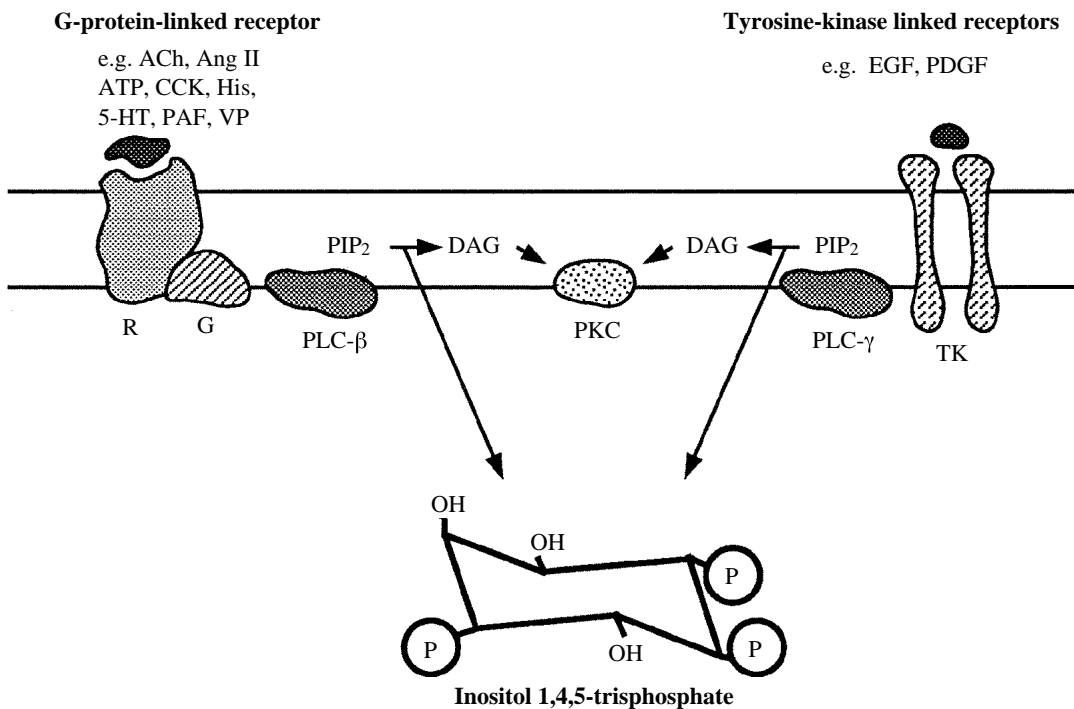

Fig. 1. Receptor-stimulated Ins(1,4,5)P<sub>3</sub> formation. Ins(1,4,5)P<sub>3</sub> is generated by the receptor-mediated activation of phospholipase C (PLC), which hydrolyses phosphatidylinositol 4,5-bisphosphate (PIP<sub>2</sub>) into 1,2-diacylglycerol (DAG) and Ins(1,4,5)P<sub>3</sub>. DAG activates proteins kinase C (PKC) in the plasma membrane, whereas Ins(1,4,5)P<sub>3</sub> binds to specific receptors on Ca<sup>2+</sup>-storing organelles and mobilizes intracellular Ca<sup>2+</sup> stores. Various isoforms of PLC are activated by different classes of cell surface receptor. Receptors (R) coupled to GTP-binding proteins (G) of the G<sub>q</sub> family stimulate PLC-β *via* activation of the G-protein. Receptors with intrinsic tyrosine kinase activity (TK) dimerize in response to agonist-stimulation: the dimers phosphorylate each other on cytosolic tyrosine residues, and these phosphotyrosine residues provide sites to which PLC-γ binds and becomes activated. ACh, acetylcholine; Ang II, angiotensin II; CCK, cholecystokinin; His, histamine; 5-HT, 5-hydroxytryptamine; PAF, platelet-activating factor; VP, vasopressin; EGF, epidermal growth factor; PDGF, platelet-derived growth factor.

*Ins(1,4,5)P<sub>3</sub> metabolism*

Ins(1,4,5)P<sub>3</sub> is inactivated by two metabolic pathways. It is either phosphorylated by a 3-kinase to yield inositol 1,3,4,5-tetrakisphosphate [Ins(1,3,4,5)P<sub>4</sub>] (Batty *et al.* 1985; Irvine *et al.* 1986) or dephosphorylated by a 5-phosphatase to give inositol 1,4-bisphosphate [Ins(1,4)P<sub>2</sub>] (Downes *et al.* 1982; Berridge *et al.* 1983). Ins(1,3,4,5)P<sub>4</sub> may itself regulate intracellular Ca<sup>2+</sup> concentration by promoting Ca<sup>2+</sup> sequestration (Hill *et al.* 1988), by synergizing with Ins(1,4,5)P<sub>3</sub> to mobilize intracellular Ca<sup>2+</sup> stores (Cullen *et al.* 1990; Gawler *et al.* 1990) or by regulating agonist-stimulated Ca<sup>2+</sup> entry across the plasma membrane (Irvine and Moor, 1986). The presence of specific Ins(1,3,4,5)P<sub>4</sub>-binding sites in a number of tissues further supports a role for Ins(1,3,4,5)P<sub>4</sub> in the phosphoinositide signalling pathway (Bradford and Irvine, 1987; Theibert *et al.* 1987; Enyedi and Williams, 1988; Donié and Reiser, 1989). Ins(1,4)P<sub>2</sub>, in contrast, probably plays no part in signal transduction and is rapidly metabolized to inositol (Storey *et al.* 1984).

**Ins(1,4,5)P<sub>3</sub> receptors***Identification*

Evidence from a variety of sources has indicated that Ins(1,4,5)P<sub>3</sub> binds to a specific Ins(1,4,5)P<sub>3</sub> receptor/Ca<sup>2+</sup> channel complex located on intracellular Ca<sup>2+</sup> stores where it directly stimulates release of Ca<sup>2+</sup> into the cytosol. Comparison of the abilities of various inositol phosphates to release Ca<sup>2+</sup> from permeabilized cells demonstrated a structure-activity relationship indicative of the binding of inositol phosphates to a specific receptor (Burgess *et al.* 1984). Ins(2,4,5)P<sub>3</sub> and Ins(4,5)P<sub>2</sub> were both able to mobilize stored Ca<sup>2+</sup>, although less potently than Ins(1,4,5)P<sub>3</sub>, whereas Ins(1,4)P<sub>2</sub> was without effect. Thus, the ability of the inositol phosphates to mobilize intracellular Ca<sup>2+</sup> depends on the presence of phosphate groups at both the 4 and 5 positions of the inositol ring and is enhanced by a phosphate at the 1 position.

High-affinity, saturable binding sites specific for Ins(1,4,5)P<sub>3</sub> have been identified in a number of tissues (Baukal *et al.* 1985; Spät *et al.* 1986; Worley *et al.* 1987; Guillemette *et al.* 1987), and binding of Ins(1,4,5)P<sub>3</sub> to these sites has been shown to correlate with Ins(1,4,5)P<sub>3</sub>-stimulated Ca<sup>2+</sup> mobilization (Spät *et al.* 1986; Guillemette *et al.* 1987). Ins(1,4,5)P<sub>3</sub> receptors have since been purified from a variety of tissues and species (Supattapone *et al.* 1988b; Maeda *et al.* 1991; Mourey *et al.* 1990; Chadwick *et al.* 1990; Parys *et al.* 1992). When reconstituted into lipid vesicles, the purified receptor mediates Ca<sup>2+</sup> flux in response to Ins(1,4,5)P<sub>3</sub>, providing firm evidence that both the Ins(1,4,5)P<sub>3</sub>-binding site and the Ca<sup>2+</sup> channel reside in the same protein complex (Ferris *et al.* 1989).

*Structure*

The structure and membrane topology of Ins(1,4,5)P<sub>3</sub> receptors is shown in Fig. 2. Each receptor consists of four similar subunits which are non-covalently associated (Mignery *et al.* 1990; Maeda *et al.* 1991). From electron microscopy of purified receptors, the four subunits have been shown to adopt a four-leaf-clover-like structure (Chadwick *et al.* 1990), at the centre of which is thought to be the Ca<sup>2+</sup> channel itself. This bears a

marked resemblance to the structure of ryanodine receptors, the Ca<sup>2+</sup> release channels of skeletal and cardiac muscle (Lai *et al.* 1988), and indeed these proteins show considerable homology in their primary sequences (Mignery *et al.* 1989), higher-order structures and in allosteric regulation (see below). The two receptors may be derived from a common ancestral gene. Our idea of how these intracellular Ca<sup>2+</sup> channels operate has been greatly influenced by the parallels that appear to exist between the two proteins.

Immunolocalization studies have revealed that both the amino and carboxy termini of the Ins(1,4,5)P<sub>3</sub> receptor subunits are cytosolic (Mignery *et al.* 1989; Nakade *et al.* 1991). Deletion of amino acid residues from the N-terminal region of the receptor either abolishes (Mignery *et al.* 1990) or greatly reduces (Miyawaki *et al.* 1991) binding of

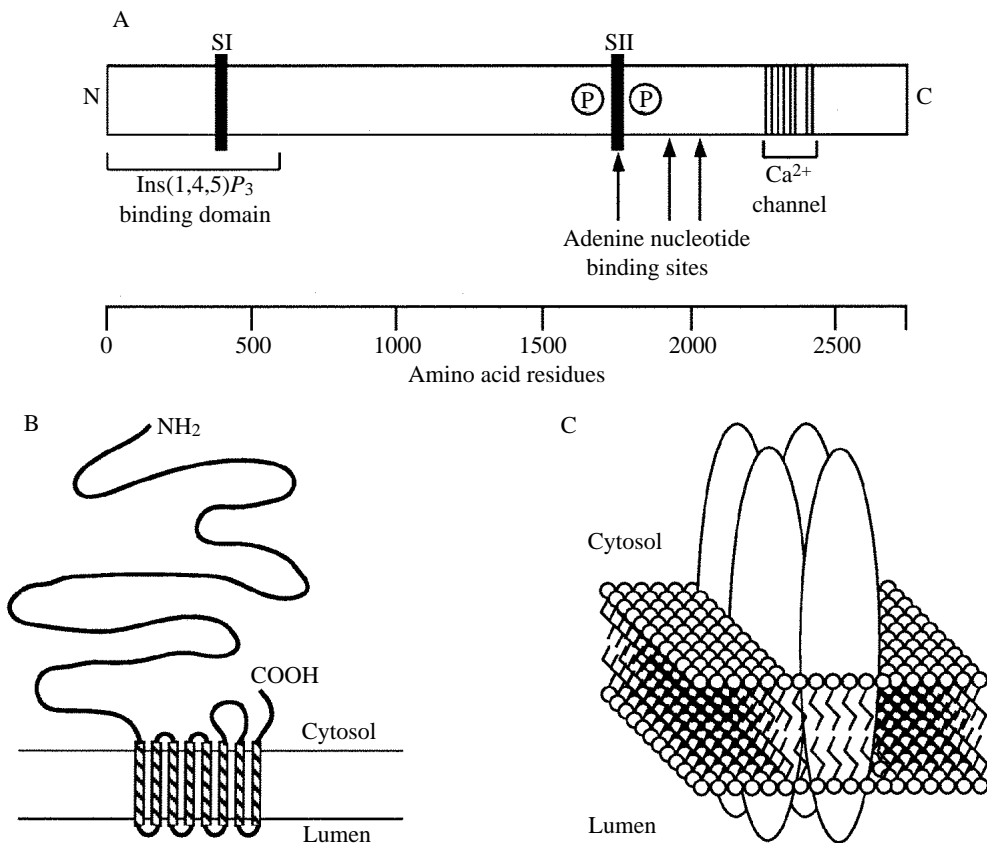

Fig. 2. Ins(1,4,5)P<sub>3</sub> receptor structure and membrane topology. (A) Primary sequence of the 2749 amino-acid rat type 1 Ins(1,4,5)P<sub>3</sub> receptor, showing the location of the Ins(1,4,5)P<sub>3</sub>-binding domain, the Ca<sup>2+</sup> channel, alternatively spliced sequences (SI and SII), three putative adenine nucleotide binding sites, and two sites (P) at which the receptor is phosphorylated by cyclic-AMP-dependent protein kinase. (B) Each subunit of the Ins(1,4,5)P<sub>3</sub> receptor is anchored into the membrane of intracellular Ca<sup>2+</sup> stores by 6–8 transmembrane regions close to the C terminus. Both the short C-terminal tail and the long N-terminal tail are cytosolic. (C) Functional Ins(1,4,5)P<sub>3</sub> receptors are made up of four non-covalently associated subunits; at the centre of these is the Ca<sup>2+</sup> channel.

Ins(1,4,5) $P_3$ , suggesting that the Ins(1,4,5) $P_3$ -binding site is located within the first 788 residues of the N terminus of each subunit. The  $Ca^{2+}$  channel is thought to reside close to the C terminus of the receptor and indeed monoclonal antibodies directed against the C terminus have been shown to inhibit  $Ca^{2+}$  release (Nakade *et al.* 1991). Hydrophobicity analysis has identified between six and eight membrane-spanning domains close to the C terminus (Mignery *et al.* 1990; Yoshikawa *et al.* 1992), which are important for anchoring the protein into membranes (Mignery and Südhof, 1990). The four putative transmembrane regions closest to the C terminus, which are flanked by a large number of net negative charges, show the highest degree of homology with ryanodine receptors, and they are therefore presumed to be important in the gating of  $Ca^{2+}$  (Mignery *et al.* 1990). The C terminus is also thought to be important in the formation of tetrameric complexes, since deletion of this portion of the receptor results in the formation of monomeric Ins(1,4,5) $P_3$ -binding proteins (Mignery and Südhof, 1990; Miyawaki *et al.* 1991).

Located between the N-terminal Ins(1,4,5) $P_3$ -binding domain and the C-terminal  $Ca^{2+}$  channel is a stretch of more than 1500 amino acid residues which is the target of a number of allosteric regulators of the Ins(1,4,5) $P_3$  receptor (discussed below). When Ins(1,4,5) $P_3$  binds to the N terminus, a large conformational change ensues (Mignery and Südhof, 1990) which is thought to link Ins(1,4,5) $P_3$  binding, *via* this long coupling domain, to opening of the  $Ca^{2+}$  channel. This may be an oversimplification, however, since we do not yet know how the Ins(1,4,5) $P_3$  receptor folds within the membrane of intracellular stores, and it is possible that regions further from the N terminus also influence Ins(1,4,5) $P_3$  binding (see Furuichi *et al.* 1989).

#### *Localization*

Ins(1,4,5) $P_3$  receptors are highly concentrated in the Purkinje cells of the cerebellum (the physiological significance of such high receptor density is not understood), with lower levels being found in other regions of the brain (Worley *et al.* 1987, 1989) and in a variety of peripheral tissues (Chadwick *et al.* 1990; Guillemette *et al.* 1990; Sharp *et al.* 1992). At a subcellular level, immunohistochemical studies in Purkinje cells, *Xenopus* oocytes and pancreatic epithelial cells have localized Ins(1,4,5) $P_3$  receptors to the rough and smooth endoplasmic reticula and the subplasmalemmal cisternae, with conflicting reports as to the presence of Ins(1,4,5) $P_3$  receptors in the nucleus and an apparent absence of receptors in the mitochondria and Golgi cisternae (Ross *et al.* 1989; Maeda *et al.* 1990; Parys *et al.* 1992; Sharp *et al.* 1992). More precise localization has been achieved using immunogold labelling, resulting in the localization of receptors to specific subcompartments of the endoplasmic reticulum (Satoh *et al.* 1990). Consistent with the Ins(1,4,5) $P_3$ -sensitive  $Ca^{2+}$  stores residing in specialized regions of the endoplasmic reticulum, vasopressin, an agonist linked to phosphoinositide metabolism, reduces the  $Ca^{2+}$  content of the rough endoplasmic reticulum in rat liver (Bond *et al.* 1987).

In some cells, Ins(1,4,5) $P_3$  receptors have been found to be associated with the plasma membrane (Kuno and Gardner, 1987; Khan *et al.* 1992), prompting speculation that Ins(1,4,5) $P_3$  may play a direct role in regulating hormone-dependent  $Ca^{2+}$  influx. These plasma-membrane-associated Ins(1,4,5) $P_3$  receptors appear to show less specificity for Ins(1,4,5) $P_3$  over other inositol phosphates compared with Ins(1,4,5) $P_3$  receptors

localized in the endoplasmic reticulum (Kalinowski *et al.* 1992). Attention has therefore been drawn towards the *Ins(1,4,5)P<sub>3</sub>* metabolite, *Ins(1,3,4,5)P<sub>4</sub>*, as a candidate for a physiological regulator of  $\text{Ca}^{2+}$  influx (Irvine, 1991). Interestingly, *Ins(1,4,5)P<sub>3</sub>* and *Ins(1,3,4,5)P<sub>4</sub>* appear to act synergistically to stimulate  $\text{Ca}^{2+}$  influx into sea urchin eggs (Irvine and Moor, 1986) and lacrimal cells (Morris *et al.* 1987), and in endothelial cells a  $\text{Ca}^{2+}$  channel within the plasma membrane appears to be activated by *Ins(1,3,4,5)P<sub>4</sub>*, but is insensitive to *Ins(1,4,5)P<sub>3</sub>* (Lückhoff and Clapham, 1992).

The mechanism(s) underlying receptor-mediated  $\text{Ca}^{2+}$  influx remain elusive, but it is clear that the products of phosphoinositide metabolism are likely to feature prominently in at least some cell types.

### ***Ins(1,4,5)P<sub>3</sub> receptor diversity***

#### *Ins(1,4,5)P<sub>3</sub> receptor subtypes*

Two distinct genes have been identified in rodent cerebellum that encode full-length sequences for *Ins(1,4,5)P<sub>3</sub>* receptors (Furuichi *et al.* 1989; Mignery *et al.* 1990; Südhof *et al.* 1991). The type 1 and type 2 receptors (2749 and 2701 amino acids in length respectively) are 69% identical in their amino acid sequences and are structurally very similar, both to each other and to the ryanodine receptor  $\text{Ca}^{2+}$  channel of skeletal muscle (Takeshima *et al.* 1989). The type 2 receptor is much less abundant than the type 1 receptor (Südhof *et al.* 1991). Significantly, the ligand-binding site and most of the transmembrane domains comprising the  $\text{Ca}^{2+}$  channel appear to be the most conserved regions between the receptor subtypes, whereas the coupling domain shows the greatest diversity (Südhof *et al.* 1991). The major functional differences between the two receptors could therefore be associated with their respective patterns of allosteric regulation. Partial sequences have now been obtained indicating at least one further subtype (Ross *et al.* 1992), which suggests that a large family of *Ins(1,4,5)P<sub>3</sub>* receptors may exist.

Full-length sequences encoding *Ins(1,4,5)P<sub>3</sub>* receptors from *Xenopus* oocytes (Kume *et al.* 1993) and *Drosophila melanogaster* (Yoshikawa *et al.* 1992) have now been determined. The *Xenopus* receptor appears to be a species variant of the type 1 receptor, displaying 90% sequence homology with the mouse cerebellar type 1 receptor, whereas the *Drosophila* receptor differs from both the type 1 and type 2 receptors to a similar extent (Yoshikawa *et al.* 1992). Once again, the receptor from *Drosophila* shows considerable sequence homology with the mouse type 1 and *Xenopus* receptors in both the ligand-binding domain and  $\text{Ca}^{2+}$  channel region, but displays considerable diversity in the coupling domain. Most significantly, the *Drosophila* receptor lacks consensus sequences for phosphorylation in the coupling domain, indicating that it is not a substrate for regulation by cyclic-AMP-dependent protein kinase (PKA).

#### *Splice variants*

*Ins(1,4,5)P<sub>3</sub>* receptor diversity can also be generated by differential splicing of receptor transcripts. Two major splice sequences, SI and SII, have been identified within the type 1 receptor. SI encodes a 15 amino-acid sequence located within the N-terminal *Ins(1,4,5)P<sub>3</sub>*-

binding domain (Mignery *et al.* 1990; Nakagawa *et al.* 1991) and may therefore influence the binding characteristics of Ins(1,4,5) $P_3$ . SII is larger, encoding 40 amino acids within the regulatory domain of the receptor (Danoff *et al.* 1991), and is made up of three smaller splice variants (A, B and C: 23, 1 and 16 residues respectively) which can each be independently removed to generate a series of different Ins(1,4,5) $P_3$  receptor transcripts (Nakagawa *et al.* 1991). The SII splice sequence is located between two PKA phosphorylation consensus sequences (Danoff *et al.* 1991), and it is therefore not surprising that receptors that differ in the expression of this splice sequence also appear to differ in their patterns of phosphorylation by PKA (see below; Danoff *et al.* 1991).

At present we have little idea as to the physiological significance of these multiple receptor transcripts, although the conservation of alternative splice events between species (Danoff *et al.* 1991) suggests an important role in the regulation of Ins(1,4,5) $P_3$  receptor activity. Recently, different Ins(1,4,5) $P_3$  receptor splice variants have been shown to be expressed in both a developmentally specific and tissue-specific manner (Danoff *et al.* 1991; Nakagawa *et al.* 1991). The formation of synapses between Purkinje cells and granule cells during cerebellar development, for example, coincides with peak expression of receptors containing the SI splice sequence, whereas other forms of the receptor show a progressively increasing level of expression throughout this period of development (Nakagawa *et al.* 1991). In mouse, Ins(1,4,5) $P_3$  receptors containing the SII splice sequence are exclusively localized in neuronal tissue, whereas the shorter forms of the receptor lacking this SII domain are found largely in the periphery (Danoff *et al.* 1991). The predominance of SII-containing receptors in neuronal tissue is, however, not common to all species, since Ins(1,4,5) $P_3$  receptors cloned from *Drosophila* head lack the SII splice sequence (Kume *et al.* 1993).

It is clear that a number of subtypes and isoforms of the Ins(1,4,5) $P_3$  receptor exist and that these can be differentially expressed both in different tissues and at different stages of development. Furthermore, cerebellar Purkinje cells are now known to express at least two, and possibly three, distinct Ins(1,4,5) $P_3$  receptors (Ross *et al.* 1992), implying that, even within a single cell, the responsiveness to Ins(1,4,5) $P_3$  may be regulated by a heterogeneous population of receptors. Whether heterogeneity can exist between the subunits in a single Ins(1,4,5) $P_3$  receptor remains to be determined, but this would provide the basis for further diversity reminiscent of many cell surface ligand-gated ion channels (Unwin, 1989).

### **Ins(1,4,5) $P_3$ receptor regulation**

Ins(1,4,5) $P_3$  receptors are the targets of a number of allosteric regulators, including protein kinases, adenine nucleotides, pH and divalent cations, all of which may play a part in determining the responsiveness of cells to Ins(1,4,5) $P_3$ . Further complexity is now apparent with the discovery that different Ins(1,4,5) $P_3$  receptor subtypes and splice variants show different patterns of allosteric regulation.

#### *Phosphorylation by cyclic-AMP-dependent protein kinase*

Cross-talk between the cyclic AMP and phosphoinositide signalling pathways is well documented (Berridge, 1975; Jenkinson and Koller, 1977; Rasmussen and Barrett, 1984).



In hepatocytes, for example, the frequency of Ca<sup>2+</sup> spikes triggered by hormones linked to Ins(1,4,5)P<sub>3</sub> production is increased by activation of receptors coupled to adenylate cyclase. Cyclic AMP is now known to phosphorylate Ins(1,4,5)P<sub>3</sub> receptors *via* the activation of PKA (Walaas *et al.* 1986). Two putative consensus sequences for phosphorylation by PKA (X-Arg-Arg-X-Ser-X) have been identified in the coupling domain of both the type 1 (Furuichi *et al.* 1989; Mignery *et al.* 1990) and type 2 (Südhof *et al.* 1991) Ins(1,4,5)P<sub>3</sub> receptors, fuelling speculation that this region of the receptor is the major target for allosteric regulators. A third putative consensus sequence located in the Ca<sup>2+</sup> channel domain has also been reported (Mignery *et al.* 1990). Although these consensus sequences are often conserved between tissues, phosphorylation of Ins(1,4,5)P<sub>3</sub> receptors by PKA appears to have different effects in different cell types. Cerebellar microsomes, for example, are 10-fold less sensitive to Ins(1,4,5)P<sub>3</sub> following cyclic-AMP-dependent phosphorylation (Supattapone *et al.* 1988a), whereas Ca<sup>2+</sup> release from permeabilized hepatocytes is potentiated by pretreatment of the cells with the catalytic subunit of PKA (Burgess *et al.* 1991). In platelets, PKA also phosphorylates Ins(1,4,5)P<sub>3</sub> receptors but there are conflicting reports as to the effects of PKA on Ca<sup>2+</sup> release (Enouf *et al.* 1987; Quinton and Dean, 1992). PKA markedly stimulates Ca<sup>2+</sup> uptake into the platelet dense tubular system, whereas the reported effects of PKA on Ins(1,4,5)P<sub>3</sub>-stimulated Ca<sup>2+</sup> release are modest by comparison (Enouf *et al.* 1987; Quinton and Dean, 1992) and may be confused with regulatory effects of luminal Ca<sup>2+</sup> on the Ins(1,4,5)P<sub>3</sub> receptors (see below).

The tissue-specific effects of PKA on Ins(1,4,5)P<sub>3</sub>-stimulated Ca<sup>2+</sup> fluxes may arise from differences in the phosphorylation patterns of distinct Ins(1,4,5)P<sub>3</sub> receptor subtypes and splice variants (see above). For example, while the long, neuronal form of the type 1 Ins(1,4,5)P<sub>3</sub> receptor is phosphorylated on both PKA consensus sequences in the coupling domain (Ser-1589 and Ser-1756), the shorter splice variant, localized in peripheral tissues, is phosphorylated at lower substrate concentrations and almost exclusively on Ser-1589 (Danoff *et al.* 1991). Differences in patterns of phosphorylation also exist between species: the recently cloned *Drosophila* Ins(1,4,5)P<sub>3</sub> receptor, for example, appears not to contain potential PKA phosphorylation sites (Yoshikawa *et al.* 1992).

#### *Phosphorylation by protein kinase C and Ca<sup>2+</sup> calmodulin-dependent protein kinase II*

In addition to PKA, Ins(1,4,5)P<sub>3</sub> receptors are now known to be targets for phosphorylation by protein kinase C (PKC) and Ca<sup>2+</sup> calmodulin-dependent protein kinase II (CaM kinase II) (Yamamoto *et al.* 1989; Ferris *et al.* 1991). The three enzymes phosphorylate the receptor at different sites (Ferris *et al.* 1991), suggesting that each may have a specific and independent role in controlling Ins(1,4,5)P<sub>3</sub> receptor activity. In each case, phosphorylation is reported to be stoichiometric (Supattapone *et al.* 1988a; Ferris *et al.* 1991), with each subunit of a receptor being phosphorylated at a single site by each kinase. However, in the case of phosphorylation by PKA, this may be an oversimplification since Ins(1,4,5)P<sub>3</sub> receptors are known to show distinctive patterns of phosphorylation depending on the expression of various alternatively spliced sequences (Danoff *et al.* 1991; see above).

At present, the functional significance of these phosphorylation events for Ins(1,4,5) $P_3$  receptor activity is poorly understood. PKC-mediated phosphorylation of Ins(1,4,5) $P_3$  receptors is reported to accelerate  $Ca^{2+}$  release (Matter *et al.* 1993), whereas the effects of phosphorylation by PKA may be either stimulatory or inhibitory (as discussed above). It is clear that phosphorylation of Ins(1,4,5) $P_3$  receptors provides a means by which different limbs of the intracellular signalling pathways may overlap to regulate tightly the release of intracellular  $Ca^{2+}$  stores. The recent finding that purified Ins(1,4,5) $P_3$  receptors themselves have intrinsic protein kinase activity, such that they are able both to autophosphorylate and to phosphorylate exogenous substrates (Ferris *et al.* 1992), further suggests that phosphorylation of the receptor is an important mechanism for regulating the actions of Ins(1,4,5) $P_3$ .

#### *Adenine nucleotides*

ATP regulates the activity of Ins(1,4,5) $P_3$  receptors in a biphasic manner. Small elevations in ATP concentration (in the range 10–500  $\mu\text{mol l}^{-1}$ ) increase the binding of Ins(1,4,5) $P_3$  to its receptor (Spät *et al.* 1992) and potentiate Ins(1,4,5) $P_3$ -stimulated  $Ca^{2+}$  fluxes (Smith *et al.* 1985; Suematsu *et al.* 1985; Ferris *et al.* 1990; Iino, 1991), whereas at higher concentrations (>500  $\mu\text{mol l}^{-1}$ ) ATP inhibits both Ins(1,4,5) $P_3$  binding (Guillemette *et al.* 1987; Willcocks *et al.* 1987; Nunn and Taylor, 1990) and  $Ca^{2+}$  release (Ferris *et al.* 1990; Iino, 1991).

The stimulatory effects of ATP are mimicked by other adenine nucleotides (Ferris *et al.* 1990; Iino, 1991) but not by GTP (Ferris *et al.* 1990), suggesting that the adenine base is important in mediating these effects. Electrophysiological studies of purified Ins(1,4,5) $P_3$  receptors reconstituted into planar lipid bilayers have demonstrated that ATP acts directly on the Ins(1,4,5) $P_3$  receptor to promote  $Ca^{2+}$  release either by increasing the open probability of  $Ca^{2+}$  channels (Ehrlich and Watras, 1988) or by promoting the formation of a larger-conductance  $Ca^{2+}$  channel (Maeda *et al.* 1991). Two putative adenine-nucleotide-binding sites (Gly-X-Gly-X-X-Gly) have been identified in the coupling domain of the cerebellar Ins(1,4,5) $P_3$  receptor (Furuichi *et al.* 1989; Mignery *et al.* 1990), and a third site is present in non-neuronal tissues following the deletion of the SII splice sequence. Binding of ATP to these sites is thought to mediate the stimulatory effects of ATP on the Ins(1,4,5) $P_3$  receptor (Ferris *et al.* 1990; Maeda *et al.* 1991).

The inhibitory effect of ATP arises from competition between ATP and Ins(1,4,5) $P_3$  for the Ins(1,4,5) $P_3$ -binding site (Willcocks *et al.* 1987; Nunn and Taylor, 1990; Iino, 1991). ATP-mediated inhibition of [ $^3\text{H}$ ]Ins(1,4,5) $P_3$  binding to purified receptors is mimicked by GTP and pyrophosphate (Maeda *et al.* 1991), suggesting that it is the binding of the pyrophosphate group of ATP to the Ins(1,4,5) $P_3$  receptor that is important in mediating the inhibitory effects of ATP.

Although ATP levels in the cytosol may be important in setting the sensitivity of Ins(1,4,5) $P_3$  receptors, there is still doubt as to whether Ins(1,4,5) $P_3$  receptors respond to changes in ATP concentration following agonist stimulation. From nuclear magnetic resonance studies in smooth muscle bundles, the intracellular ATP concentration has been shown to remain fairly constant, in the range 1–2  $\text{mmol l}^{-1}$ , even following maximal agonist stimulation (Kushmeric *et al.* 1986). It is still conceivable, however, that local

changes in ATP concentration, possibly in the vicinity of the Ca<sup>2+</sup>-ATPase pumps, which may be maximally activated following cell stimulation, may be important in controlling the activity of Ins(1,4,5)P<sub>3</sub> receptors in intact cells.

#### *pH*

Binding of Ins(1,4,5)P<sub>3</sub> to its receptor and Ins(1,4,5)P<sub>3</sub>-stimulated Ca<sup>2+</sup> release are both favoured by alkaline pH, optimally in the range 7.5–9 (Brass and Joseph, 1985; Worley *et al.* 1987; Joseph *et al.* 1989). These effects are mediated by an increase in the affinity of Ins(1,4,5)P<sub>3</sub> receptors for their ligand rather than by an increase in the number of available Ins(1,4,5)P<sub>3</sub>-binding sites (Joseph *et al.* 1989).

The steep dependence of Ins(1,4,5)P<sub>3</sub> binding on pH suggests that small increases in intracellular pH may have a stimulatory effect on Ca<sup>2+</sup> release in an intact cell. Indeed, growth factors and hormones that stimulate phosphoinositide turnover are also known to cause alkalization of the cytosol (by up to 0.3pHunits) *via* the activation of protein kinase C (PKC) (Horne *et al.* 1981). Once activated, PKC is able to stimulate the membrane-bound Na<sup>+</sup>/H<sup>+</sup> antiporter, which extrudes H<sup>+</sup> from the cytosol. This raises the attractive possibility of crosstalk between the two limbs of the phosphoinositide signalling pathway.

#### *Sulphydryl reagents*

In a number of cell types, sulphydryl reagents such as thimerosal and oxidized glutathione trigger Ca<sup>2+</sup> oscillations (Swann, 1991; Bootman *et al.* 1992). In hamster eggs, these oscillations can be inhibited by monoclonal antibodies directed against the C terminus of the Ins(1,4,5)P<sub>3</sub> receptor, suggesting a central role for Ins(1,4,5)P<sub>3</sub> receptors in the responses (Miyazaki *et al.* 1992). It has been proposed that the stimulation of Ca<sup>2+</sup> oscillations by oxidized glutathione and thimerosal is dependent on their ability to increase the affinity of Ins(1,4,5)P<sub>3</sub> receptors for Ins(1,4,5)P<sub>3</sub> (Hilly *et al.* 1993) and subsequently to sensitize the release of Ins(1,4,5)P<sub>3</sub>-sensitive Ca<sup>2+</sup> stores (Missiaen *et al.* 1991), although several groups have reported inhibitory effects of thimerosal on Ins(1,4,5)P<sub>3</sub> receptors (Adunyah and Dean, 1986; Guillemette and Segui, 1988). These findings are reconciled by the observation that, at low concentrations, thimerosal sensitizes Ins(1,4,5)P<sub>3</sub>-stimulated Ca<sup>2+</sup> release from cerebellar microsomes, but at higher concentrations it is inhibitory (Sayers *et al.* 1993).

In resting cells, the concentration of oxidized glutathione is more than 20-fold lower than the concentration of the reduced form, and is out of the range at which it is believed to regulate the activity of Ins(1,4,5)P<sub>3</sub> receptors. We do not yet know whether physiological changes in redox state within cells can influence the activity of Ins(1,4,5)P<sub>3</sub> receptors.

#### *Cytosolic Ca<sup>2+</sup>*

The regulatory effects of cytosolic Ca<sup>2+</sup> on the Ins(1,4,5)P<sub>3</sub> receptor are confusing. Ca<sup>2+</sup> inhibits [<sup>3</sup>H]Ins(1,4,5)P<sub>3</sub> binding to cerebellar membranes (Worley *et al.* 1987), stimulates binding in liver (Pietri *et al.* 1990), but has no effect on the binding of Ins(1,4,5)P<sub>3</sub> to its receptor in vas deferens (Mourey *et al.* 1990). Similarly, Ca<sup>2+</sup>

reportedly inhibits  $\text{Ca}^{2+}$  release in some instances (Joseph *et al.* 1989; Willems *et al.* 1990; Zhao and Muallem, 1990) but not in others (Brass and Joseph, 1985). While some tissue specificity may exist, other factors have certainly contributed to these inconsistent observations. The inhibitory effect of  $\text{Ca}^{2+}$  on cerebellar  $\text{Ins}(1,4,5)\text{P}_3$  receptors has been ascribed to an accessory protein, termed calmedin, which is enriched in cerebellum but exists at much lower concentrations in the periphery (Danoff *et al.* 1988). Once purified, the cerebellar  $\text{Ins}(1,4,5)\text{P}_3$  receptor is insensitive to  $\text{Ca}^{2+}$ , but sensitivity is restored by addition of solubilized cerebellar membranes enriched in calmedin activity (Supattapone *et al.* 1988b). However, recent evidence suggests that rather than being a  $\text{Ca}^{2+}$ -binding accessory protein, calmedin may be a  $\text{Ca}^{2+}$ -sensitive isoform of PLC (Mignery *et al.* 1992). Apparent  $\text{Ca}^{2+}$ -dependent inhibition of  $\text{Ins}(1,4,5)\text{P}_3$  binding might then simply reflect  $\text{Ca}^{2+}$ -stimulated production of endogenous  $\text{Ins}(1,4,5)\text{P}_3$ , which would compete with radiolabelled  $\text{Ins}(1,4,5)\text{P}_3$  for the receptor. Another complexity arises from the observation that, at high concentrations, a number of frequently used  $\text{Ca}^{2+}$  buffers, including the fluorescent  $\text{Ca}^{2+}$  indicator dye Fura-2, have been shown to act as competitive antagonists at the  $\text{Ins}(1,4,5)\text{P}_3$  receptor (Richardson and Taylor, 1993). As free  $\text{Ca}^{2+}$  concentrations are adjusted in experimental protocols, so too are the concentrations of free  $\text{Ca}^{2+}$  chelators.

Finally, regulation of  $\text{Ins}(1,4,5)\text{P}_3$  receptors by cytosolic  $\text{Ca}^{2+}$  is now known to be highly concentration-dependent. Small elevations in cytosolic  $[\text{Ca}^{2+}]$  ( $<300\text{nmol l}^{-1}$ ) potentiate both  $\text{Ca}^{2+}$  release and channel opening, whereas at higher concentrations  $\text{Ca}^{2+}$  is inhibitory (Iino, 1990; Bezprozvanny *et al.* 1991; Finch *et al.* 1991). These effects of  $\text{Ca}^{2+}$  operate on a rapid time-scale, suggesting that they may play an important role in the regulation of  $\text{Ins}(1,4,5)\text{P}_3$ -stimulated  $\text{Ca}^{2+}$  release in intact cells (Iino and Endo, 1992). In liver, at least three distinct affinity and conductance states of the  $\text{Ins}(1,4,5)\text{P}_3$  receptor have been identified (Fig. 3). When cytosolic  $\text{Ca}^{2+}$  is elevated ( $<700\text{nmol l}^{-1}$ ), receptors are converted from a state with low affinity for  $\text{Ins}(1,4,5)\text{P}_3$  to a state with high affinity (Pietri *et al.* 1990), both states being able to conduct  $\text{Ca}^{2+}$  in response to  $\text{Ins}(1,4,5)\text{P}_3$  (Marshall and Taylor, 1993). As  $\text{Ca}^{2+}$  is further elevated ( $>1\ \mu\text{mol l}^{-1}$ ), receptors maintain their high-affinity conformation but are unable to conduct  $\text{Ca}^{2+}$  when bound to  $\text{Ins}(1,4,5)\text{P}_3$ .

Considering the oscillatory changes in cytosolic  $\text{Ca}^{2+}$  during cell activation,  $\text{Ca}^{2+}$  itself has the potential to regulate its own release from  $\text{Ins}(1,4,5)\text{P}_3$ -sensitive  $\text{Ca}^{2+}$  stores. Such regulatory control is, therefore, a key component in several recent models used to describe the complex organization of  $\text{Ca}^{2+}$  signals (discussed below).

#### *Luminal $\text{Ca}^{2+}$*

$\text{Ca}^{2+}$  within the lumen of the sarcoplasmic reticulum has been shown to enhance opening of ryanodine receptors in skeletal muscle (Nelson and Nelson, 1990), prompting speculation of a similar role for luminal  $\text{Ca}^{2+}$  in regulating  $\text{Ins}(1,4,5)\text{P}_3$  receptors (Irvine, 1991). Evidence for such a role, however, has been difficult to obtain for a number of reasons. Unlike the situation in the cytosol, where  $\text{Ca}^{2+}$  buffers can be used to titrate the cytosolic  $[\text{Ca}^{2+}]$ , the  $[\text{Ca}^{2+}]$  within the lumen of stores cannot be reliably measured. Experimental procedures have therefore relied on the manipulation of luminal  $[\text{Ca}^{2+}]$ ,

either by overloading the Ca<sup>2+</sup> stores (Missiaen *et al.* 1991) or by progressively discharging full stores using Ca<sup>2+</sup> ionophores or Ca<sup>2+</sup> pump inhibitors (Nunn and Taylor, 1990; Marshall and Taylor, 1993). To compound these problems, the effects of luminal Ca<sup>2+</sup> on Ins(1,4,5)P<sub>3</sub> receptor activity are modest compared with those of cytosolic Ca<sup>2+</sup>. Depleting Ca<sup>2+</sup> stores reduces their affinity for Ins(1,4,5)P<sub>3</sub> only twofold (Oldershaw and Taylor, 1993), with a similar effect on the EC<sub>50</sub> for Ca<sup>2+</sup> release (Nunn and Taylor, 1990). The failure of some groups to detect effects of luminal Ca<sup>2+</sup> on Ins(1,4,5)P<sub>3</sub> receptors (Shuttleworth, 1992; Combettes *et al.* 1993) may be due to the extensive store depletion that is required before these effects become evident (Marshall and Taylor, 1993).

Although the effects of luminal Ca<sup>2+</sup> on the Ins(1,4,5)P<sub>3</sub> receptor are modest, there is some evidence to suggest that changes in luminal [Ca<sup>2+</sup>]<sub>i</sub> also modulate the regulatory

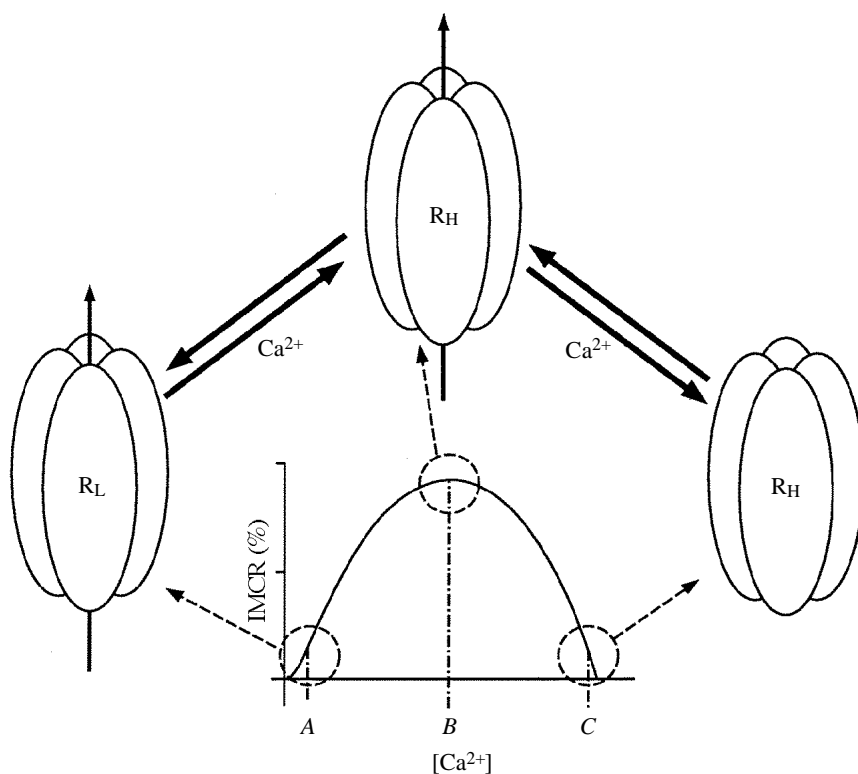

Fig. 3. Interconversion between different conformations of the liver Ins(1,4,5)P<sub>3</sub> receptor by cytosolic Ca<sup>2+</sup>. Ins(1,4,5)P<sub>3</sub>-mediated Ca<sup>2+</sup> release (IMCR) is biphasically controlled by cytosolic Ca<sup>2+</sup> concentration ([Ca<sup>2+</sup>]<sub>i</sub>) (centre). Small elevations in [Ca<sup>2+</sup>]<sub>i</sub> (<300nmol l<sup>-1</sup> Ca<sup>2+</sup>; A to B) increase the extent of IMCR, whereas larger elevations (>300nmol l<sup>-1</sup> Ca<sup>2+</sup>; B to C) reduce IMCR. These changes in IMCR reflect conversion between different conformations of the Ins(1,4,5)P<sub>3</sub> receptor. At low [Ca<sup>2+</sup>]<sub>i</sub> (A), receptors have a low affinity for Ins(1,4,5)P<sub>3</sub> (R<sub>L</sub>) and are able to conduct Ca<sup>2+</sup>. Following small elevations in [Ca<sup>2+</sup>]<sub>i</sub> (100–300nmol l<sup>-1</sup>; B), receptors remain active and are shifted to a higher-affinity conformation (R<sub>H</sub>). Further elevations in [Ca<sup>2+</sup>]<sub>i</sub> (>1 μmol l<sup>-1</sup>; C) convert receptors to a non-conducting conformation which maintains a high affinity for Ins(1,4,5)P<sub>3</sub>.

effects of cytosolic  $\text{Ca}^{2+}$  (Missiaen *et al.* 1992): thus, a three-way balance may exist in which  $\text{Ins}(1,4,5)\text{P}_3$ , cytosolic  $\text{Ca}^{2+}$  and luminal  $\text{Ca}^{2+}$  interdependently regulate the opening of  $\text{Ins}(1,4,5)\text{P}_3$  receptors.

### $\text{Mg}^{2+}$

$\text{Mg}^{2+}$  inhibits both  $\text{Ins}(1,4,5)\text{P}_3$  binding (Varney *et al.* 1990; White *et al.* 1991) and  $\text{Ins}(1,4,5)\text{P}_3$ -stimulated  $\text{Ca}^{2+}$  mobilization (Volpe *et al.* 1990) at concentrations slightly lower than those found in intact cells (Brooks and Bachelard, 1989). At present, we have little information concerning  $\text{Mg}^{2+}$  concentration fluctuations during agonist stimulation, but it is possible that, when cytosolic  $[\text{Ca}^{2+}]$  is increased,  $\text{Mg}^{2+}$  may be displaced from  $\text{Ca}^{2+}/\text{Mg}^{2+}$ -binding proteins, such as parvalbumin, thereby transiently elevating intracellular  $\text{Mg}^{2+}$  levels. Interpreting how  $\text{Mg}^{2+}$  is affecting  $\text{Ins}(1,4,5)\text{P}_3$  receptors may be more difficult: apart from its putative role as an allosteric regulator,  $\text{Mg}^{2+}$  also stimulates metabolism of  $\text{Ins}(1,4,5)\text{P}_3$  via activation of the 5-phosphatase and is essential for  $\text{Ins}(1,4,5)\text{P}_3$  receptor autophosphorylation (Ferris *et al.* 1992).

### **$\text{Ins}(1,4,5)\text{P}_3$ -stimulated $\text{Ca}^{2+}$ mobilization**

When  $\text{Ins}(1,4,5)\text{P}_3$  binds to its receptor, there is a conformational change in the receptor complex (Mignery and Südhof, 1990) and an increase in the frequency of  $\text{Ca}^{2+}$  channel opening (Ehrlich and Watras, 1988), resulting in the release of  $\text{Ca}^{2+}$  from intracellular stores (Streb *et al.* 1983). Rapid kinetic measurements of  $\text{Ca}^{2+}$  release in permeabilized (Champeil *et al.* 1989; Meyer *et al.* 1990) and intact (Ogden *et al.* 1990) cells have revealed a delay of less than 100ms between the addition of  $\text{Ins}(1,4,5)\text{P}_3$  and the onset of  $\text{Ca}^{2+}$  mobilization, indicating that the latency of receptor-mediated  $[\text{Ca}^{2+}]$  changes is primarily determined by the rate of  $\text{Ins}(1,4,5)\text{P}_3$  formation.

Electrophysiological studies suggest that four subconductance states exist for single  $\text{Ins}(1,4,5)\text{P}_3$  receptors (Watras *et al.* 1991); these may arise from different numbers of  $\text{Ins}(1,4,5)\text{P}_3$  molecules binding to the tetrameric receptor complex. With the possibility that heterogeneous  $\text{Ins}(1,4,5)\text{P}_3$  receptor subunits may exist in a single receptor, there is certainly scope for a large family of  $\text{Ins}(1,4,5)\text{P}_3$  receptors that differ in their  $\text{Ca}^{2+}$  conductances. Some groups have reported cooperative  $\text{Ins}(1,4,5)\text{P}_3$ -stimulated  $\text{Ca}^{2+}$  release from intracellular stores (Champeil *et al.* 1989; Meyer *et al.* 1990). However, such cooperativity is not evident under conditions in which the cytosolic  $[\text{Ca}^{2+}]$  is clamped (Finch *et al.* 1991) and is, therefore, more likely to be a consequence of the stimulatory effects of cytosolic  $\text{Ca}^{2+}$  on  $\text{Ins}(1,4,5)\text{P}_3$ -stimulated  $\text{Ca}^{2+}$  release (see above).  $\text{Ca}^{2+}$  release in intact cells may, nevertheless, show steep dependence on  $\text{Ins}(1,4,5)\text{P}_3$  concentrations as a result of this regulatory effect of cytosolic  $\text{Ca}^{2+}$ .

A further complexity in the mechanism of  $\text{Ins}(1,4,5)\text{P}_3$ -stimulated  $\text{Ca}^{2+}$  release is the phenomenon of 'quantal'  $\text{Ca}^{2+}$  mobilization, whereby low concentrations of  $\text{Ins}(1,4,5)\text{P}_3$  are able to mobilize only a fraction of the  $\text{Ins}(1,4,5)\text{P}_3$ -sensitive  $\text{Ca}^{2+}$  stores (Muallem *et al.* 1989; Taylor and Potter, 1990), despite the inability of  $\text{Ins}(1,4,5)\text{P}_3$  receptors to desensitize intrinsically (Oldershaw *et al.* 1992). Although a number of explanations for this phenomenon have been proposed, neither the mechanism nor the physiological significance of quantal  $\text{Ca}^{2+}$  mobilization is understood.

**Role of *Ins(1,4,5)P<sub>3</sub>* in the organization of  $Ca^{2+}$  signals**

The  $Ca^{2+}$  signals evoked by receptor activation are complex, occurring in many cells as repetitive  $Ca^{2+}$  spikes (see Berridge, 1990), which may be arranged spatially as regenerative waves (Jacob, 1990; Rooney *et al.* 1990) or even as spirals of  $Ca^{2+}$  release (Lechleiter *et al.* 1991). Models which describe the generation and propagation of  $Ca^{2+}$  signals are plentiful (reviewed by Berridge, 1990) and differ in the extent to which *Ins(1,4,5)P<sub>3</sub>* contributes. *Ins(1,4,5)P<sub>3</sub>* plays an important role in triggering regenerative  $Ca^{2+}$  signals in many cells (Oron *et al.* 1985; Parker and Miledi, 1986; Wakui *et al.* 1989), and more recently it has been shown to be essential for the propagation of  $Ca^{2+}$  waves in *Xenopus* oocytes (DeLisle and Welsh, 1992) and fertilized hamster eggs (Miyazaki *et al.* 1992). Consistent with these observations, recent models to describe how  $Ca^{2+}$  waves propagate across cells invoke the sequential release of *Ins(1,4,5)P<sub>3</sub>*-sensitive  $Ca^{2+}$  stores: it is necessary, therefore, to determine how these stores are regulated so as to release their  $Ca^{2+}$  in a sequential manner.

If diffusion of *Ins(1,4,5)P<sub>3</sub>* *per se* were to account for the sequential discharge of  $Ca^{2+}$  stores, one would expect  $Ca^{2+}$  waves to propagate across cells at a non-uniform rate, a feature not easily reconciled with experimental observations (Rooney *et al.* 1990).

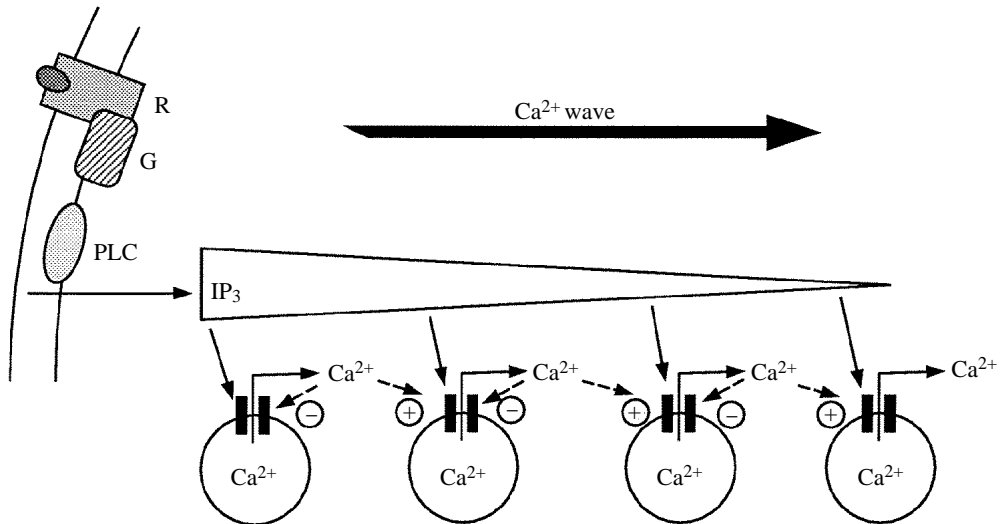

Fig. 4. Model for  $Ca^{2+}$  wave propagation. Stimulation of G-protein-linked (G) cell surface receptors (R) leads to the activation of phospholipase C (PLC) and the production of *Ins(1,4,5)P<sub>3</sub>* ( $IP_3$ ).  $Ca^{2+}$  stores closest to the site of *Ins(1,4,5)P<sub>3</sub>* production release their  $Ca^{2+}$  in response to the high concentration of *Ins(1,4,5)P<sub>3</sub>*. The  $Ca^{2+}$  released from these stores sensitizes *Ins(1,4,5)P<sub>3</sub>* receptors further from the site of *Ins(1,4,5)P<sub>3</sub>* production, allowing them to respond to the lower concentration of *Ins(1,4,5)P<sub>3</sub>*. In this way, the  $Ca^{2+}$  wave propagates by the sequential discharge of *Ins(1,4,5)P<sub>3</sub>*-sensitive  $Ca^{2+}$  stores. Once  $Ca^{2+}$  has been released from a store, the *Ins(1,4,5)P<sub>3</sub>* receptors on that store are exposed to a much higher  $[Ca^{2+}]$  and become desensitized, allowing  $Ca^{2+}$  to be pumped back into the stores in preparation for a subsequent  $Ca^{2+}$  wave.

Another possibility is that release of Ins(1,4,5) $P_3$ -sensitive  $Ca^{2+}$  stores is regulated by a signal transmitted concomitantly with the  $Ca^{2+}$  wave; the complex control of Ins(1,4,5) $P_3$  receptor sensitivity by cytosolic  $Ca^{2+}$  (discussed above) suggests that  $Ca^{2+}$  itself is a likely candidate. The  $Ca^{2+}$  wave might then propagate across the cell as follows (Fig. 4). Prior to receptor activation, resting cytosolic  $[Ca^{2+}]$  is low (approximately  $100\text{nmol l}^{-1}$ ), so that Ins(1,4,5) $P_3$  receptors are in a conformation with low affinity for Ins(1,4,5) $P_3$  (see Fig. 3). Activation of cell surface receptors triggers production of Ins(1,4,5) $P_3$  at the plasma membrane, which stimulates neighbouring Ins(1,4,5) $P_3$ -sensitive stores to release their  $Ca^{2+}$  into the cytosol. The  $Ca^{2+}$  released from these stores then sensitizes Ins(1,4,5) $P_3$  receptors on stores deeper inside the cell, allowing them to respond to the lower levels of Ins(1,4,5) $P_3$  further from the plasma membrane. The  $Ca^{2+}$  wave would then propagate by the concerted actions of Ins(1,4,5) $P_3$  and  $Ca^{2+}$  on Ins(1,4,5) $P_3$  receptors. Once a store releases its  $Ca^{2+}$ , Ins(1,4,5) $P_3$  receptors on that store may become inactive as a result of the inhibitory effects of the high local cytosolic  $[Ca^{2+}]$  and the reduced luminal  $[Ca^{2+}]$  (discussed above). This would render Ins(1,4,5) $P_3$ -sensitive  $Ca^{2+}$  stores refractory to Ins(1,4,5) $P_3$ , allowing them to refill in preparation for a subsequent  $Ca^{2+}$  wave. Support for this model comes from the study of agonist-evoked oscillations in pancreatic acinar cells, where the frequency of oscillations is increased in response to small elevations in cytosolic  $Ca^{2+}$  ( $<200\text{nmol l}^{-1}$ ), but reduced when cytosolic  $Ca^{2+}$  is raised above  $500\text{nmol l}^{-1}$  (Zhang *et al.* 1992).

Recently, single spontaneous  $Ca^{2+}$  spikes have been recorded in populations of permeabilized hepatocytes (Missiaen *et al.* 1991, 1992); they have been attributed to the synchronized discharge of Ins(1,4,5) $P_3$ -sensitive  $Ca^{2+}$  stores. Overloading of these stores with  $Ca^{2+}$  appeared to sensitize Ins(1,4,5) $P_3$ -stimulated  $Ca^{2+}$  release, allowing the stores to respond to basal levels of Ins(1,4,5) $P_3$ . These responses were preceded by a pacemaker rise in cytosolic  $Ca^{2+}$  concentration, which may reflect the involvement of a positive feedback effect of cytosolic  $[Ca^{2+}]$  on Ins(1,4,5) $P_3$ -stimulated  $Ca^{2+}$  release during the rising phase of the spikes. Interestingly, these spontaneous  $Ca^{2+}$  spikes in permeabilized cell suspensions are critically dependent on ATP concentration, pH, cytosolic  $[Ca^{2+}]$  and cell density, and are sensitized by sulphhydryl reagents (Missiaen *et al.* 1992). An attractive possibility is that they represent a crude demonstration *in vitro* of the  $Ca^{2+}$  spikes seen in intact cells: here, the responses are evident in a system in which the cytosol from a population of cells has been effectively pooled. If this proves to be the case, it is clear that a number of cytosolic regulators of Ins(1,4,5) $P_3$  receptor activity are critically important in setting the conditions for the generation of  $Ca^{2+}$  signals.

Work from the authors' laboratory is supported by the Wellcome Trust and an SERC-CASE award with SmithKline Beecham to I.C.B.M. C.W.T. is a Lister Institute Research Fellow.

### References

- ADUNYAH, S. E. AND DEAN, W. L. (1986). Effects of sulphhydryl reagents and other inhibitors on  $Ca^{2+}$  transport and inositol trisphosphate-induced  $Ca^{2+}$  release from human platelet membranes. *J. biol. Chem.* **261**, 13071-13075.



- BATTY, I. R., NAHORSKI, R. AND IRVINE, R. F. (1985). Rapid formation of inositol-1,3,4,5-tetrakisphosphate following muscarinic receptor stimulation of rat cerebral cortex slices. *Biochem. J.* **232**, 211–215.
- BAUKAL, A. J., GUILLETTE, G., RUBIN, R., SPÄT, A. AND CATT, K. J. (1985). Binding sites for inositol trisphosphate in the bovine adrenal cortex. *Biochem. biophys. Res. Commun.* **133**, 532–538.
- BERRIDGE, M. J. (1975). The interaction of cyclic nucleotides and calcium in the control of cellular activity. *Adv. cyclic Nucleotide Res.* **6**, 1–98.
- BERRIDGE, M. J. (1990). Calcium oscillations. *J. biol. Chem.* **265**, 9583–9586.
- BERRIDGE, M. J. (1993). Inositol trisphosphate and calcium signalling. *Nature* **361**, 315–325.
- BERRIDGE, M. J., DAWSON, R. C. M., DOWNES, C. P., HESLOP, J. P. AND IRVINE, R. F. (1983). Changes in levels of inositol phosphates after agonist-dependent hydrolysis of membrane phosphoinositides. *Biochem. J.* **212**, 473–482.
- BERRIDGE, M. J. AND GALIONE, A. (1988). Cytosolic calcium oscillators. *FASEB J.* **2**, 3074–3082.
- BERRIDGE, M. J. AND IRVINE, R. F. (1984). Inositol trisphosphate, a novel second messenger in cellular signal transduction. *Nature* **312**, 315–321.
- BERRIDGE, M. J. AND IRVINE, R. F. (1989). Inositol phosphates and cell signalling. *Nature* **341**, 197–205.
- BEZPROZVANNY, I., WATRAS, J. AND EHRLICH, B. E. (1991). Bell-shaped calcium-response curves of Ins(1,4,5)P<sub>3</sub>- and calcium-gated channels from endoplasmic reticulum of cerebellum. *Nature* **351**, 751–754.
- BOND, M., VADASZ, G., SOMLYO, A. V. AND SOMLYO, A. P. (1987). Subcellular calcium and magnesium mobilization in rat liver stimulated *in vivo* with vasopressin and glucagon. *J. biol. Chem.* **262**, 15630–15636.
- BOOTMAN, M. D., TAYLOR, C. W. AND BERRIDGE, M. J. (1992). The thiol reagent thimerosal evokes calcium spikes in HeLa cells by sensitizing the inositol 1,4,5-trisphosphate receptor. *J. biol. Chem.* **267**, 25113–25119.
- BRADFORD, P. G. AND IRVINE, R. F. (1987). Specific binding sites for [<sup>3</sup>H]inositol (1,3,4,5)tetrakisphosphate on membranes of HL-60 cells. *Biochem. biophys. Res. Commun.* **149**, 680–686.
- BRASS, L. F. AND JOSEPH, S. K. (1985). A role for inositol trisphosphate in intracellular Ca<sup>2+</sup> mobilization and granule secretion in platelets. *J. biol. Chem.* **260**, 15172–15179.
- BROOKS, K. J. AND BACHELARD, M. S. (1989). Changes in intracellular free magnesium during hypoglycaemia and hypoxia in cerebral tissue as calculated from <sup>31</sup>P-nuclear magnetic resonance spectra. *J. Neurochem.* **53**, 331–334.
- BURGESS, G. M., BIRD, G. STJ., OBIE, J. F. AND PUTNEY, J. W. (1991). The mechanism for synergism between phospholipase C- and adenylyl cyclase-linked hormones in liver. *J. biol. Chem.* **266**, 4772–4781.
- BURGESS, G. M., GODFREY, P., MCKINNEY, J. S., BERRIDGE, M. J., IRVINE, R. F. AND PUTNEY, J. W. (1984). The second messenger linking receptor activation to internal Ca release in liver. *Nature* **309**, 63–66.
- CHADWICK, C. C., SAITO, A. AND FLEISCHER, S. (1990). Isolation and characterization of the inositol trisphosphate receptor from smooth muscle. *Proc. natn. Acad. Sci. U.S.A.* **87**, 2132–2136.
- CHAMPEIL, P., COMBETTES, L., BERTHON, B., DOUCET, E., ORLOWSKI, S. AND CLARET, M. (1989). Fast kinetics of calcium release induced by myo-inositol trisphosphate in permeabilized rat hepatocytes. *J. biol. Chem.* **264**, 17665–17673.
- CHEEK, T. AND BARRY, V. A. (1993). Stimulus–secretion coupling in excitable cells: a central role for calcium. *J. exp. Biol.* **184**, 183–196.
- COMBETTES, L., CLARET, M. AND CHAMPEIL, P. (1993). Calcium control on InsP<sub>3</sub>-induced discharge of calcium from permeabilized hepatocyte pool. *Cell Calcium* **14**, 279–292.
- CULLEN, P. J., IRVINE, R. F. AND DAWSON, A. P. (1990). Synergistic control of Ca<sup>2+</sup> mobilization in permeabilized mouse L1210 lymphoma cells by inositol 2,4,5-trisphosphate and inositol 1,3,4,5-tetrakisphosphate. *Biochem. J.* **271**, 549–553.
- DANOFF, S. K., FERRIS, C. D., DONATH, C., FISCHER, G. A., MUNEMITSU, S., ULLRICH, A., SNYDER, S. H. AND ROSS, C. A. (1991). Inositol 1,4,5-trisphosphate receptors: Distinct neuronal and nonneuronal forms derived by alternative splicing differ in phosphorylation. *Proc. natn. Acad. Sci. U.S.A.* **88**, 2951–2955.
- DANOFF, S. K., SUPATTAPONE, S. AND SNYDER, S. H. (1988). Characterization of a membrane protein

- from brain mediating the inhibition of inositol 1,4,5-trisphosphate receptor binding by calcium. *Biochem. J.* **254**, 701–705.
- DELISLE, S. AND WELSH, M. J. (1992). Inositol trisphosphate is required for the propagation of calcium waves in *Xenopus* oocytes. *J. biol. Chem.* **267**, 7963–7966.
- DONIÉ, F. AND REISER, G. (1989). A novel specific binding protein assay for quantitation of intracellular inositol 1,3,4,5-tetrakisphosphate (InsP<sub>4</sub>) using a high-affinity InsP<sub>4</sub> receptor from cerebellum. *FEBS Lett.* **254**, 155–158.
- DOWNES, C. P., MUSSATT, M. C. AND MICHELL, R. H. (1982). The inositol trisphosphate phosphomonoesterase of the human erythrocyte membrane. *Biochem. J.* **203**, 169–177.
- EHRlich, B. E. AND WATRAs, J. (1988). Inositol 1,4,5-trisphosphate activates a channel from smooth muscle sarcoplasmic reticulum. *Nature* **336**, 583–586.
- ENOUF, J., GIRAUD, F., BREDoux, R., BOURDEAU, N. AND LEVY-TOLEDANO, S. (1987). Possible role for cyclic AMP-dependent phosphorylation in the calcium release mediated by inositol 1,4,5-trisphosphate in human platelet membrane vesicles. *Biochim. biophys. Acta.* **928**, 76–82.
- ENYEDI, P. AND WILLIAMS, G. H. (1988). Heterogeneous inositol tetrakisphosphate binding sites in the adrenal cortex. *J. biol. Chem.* **263**, 7940–7942.
- FERRIS, C. D., CAMERON, A. M., BREDT, D. S., HUGANIR, R. L. AND SNYDER, S. H. (1992). Autophosphorylation of inositol 1,4,5-trisphosphate receptors. *J. biol. Chem.* **267**, 7036–7041.
- FERRIS, C. D., HUGANIR, R. L., BREDT, D. S., CAMERON, A. M. AND SNYDER, S. H. (1991). Inositol trisphosphate receptor: phosphorylation by protein kinase C and calcium calmodulin-dependent protein kinases in reconstituted lipid vesicles. *Proc. natn. Acad. Sci. U.S.A.* **88**, 2232–2235.
- FERRIS, C. D., HUGANIR, R. L. AND SNYDER, S. H. (1990). Calcium flux mediated by purified inositol 1,4,5-trisphosphate receptor in reconstituted lipid vesicles is allosterically regulated by adenine nucleotides. *Proc. natn. Acad. Sci. U.S.A.* **87**, 2147–2151.
- FERRIS, C. D., HUGANIR, R. L., SUPATTAPONE, S. AND SNYDER, S. H. (1989). Purified inositol 1,4,5-trisphosphate receptor mediates calcium flux in reconstituted lipid vesicles. *Nature* **342**, 87–89.
- FINCH, E. A., TURNER, T. J. AND GOLDIN, S. M. (1991). Calcium as a coagonist of inositol 1,4,5-trisphosphate-induced calcium release. *Science* **252**, 443–446.
- FURUICHI, T., YOSHIKAWA, S., MIYAWAKI, A., WADA, K., MAEDA, N. AND MIKOSHIBA, K. (1989) Primary structure and functional expression of the inositol 1,4,5-trisphosphate-binding protein P<sub>400</sub>. *Nature* **342**, 32–38.
- GAWLER, D. J., POTTER, B. V. L. AND NAHORSKI, S. R. (1990). Inositol 1,3,4,5-tetrakisphosphate-induced release of intracellular Ca<sup>2+</sup> in SH-SY5Y neuroblastoma cells. *Biochem. J.* **272**, 519–524.
- GILLOT, I. AND WHITAKER, M. (1993). Imaging calcium waves in eggs and embryos. *J. exp. Biol.* **184**, 213–219.
- GUILLEMETTE, G., BALLA, T., BAUKAL, A. J., SPÄT, A. AND CATT, K. J. (1987). Intracellular receptors for inositol 1,4,5-trisphosphate in angiotensin II target tissues. *J. biol. Chem.* **262**, 1010–1015.
- GUILLEMETTE, G., FAVREAU, I., BOULAY, G. AND POTIER, M. (1990). Solubilization and partial characterization of inositol 1,4,5-trisphosphate receptor of bovine adrenal cortex reveal similarities with the receptor of rat cerebellum. *Molec. Pharmac.* **38**, 841–847.
- GUILLEMETTE, G. AND SEGUI, J. A. (1988). Effects of pH, reducing and alkylating reagents on the binding and Ca<sup>2+</sup> release activities of inositol 1,4,5-trisphosphate in the bovine adrenal cortex. *Molec. Endocr.* **2**, 1249–1255.
- HAROOTUNIAN, A. T., KAO, J. P. Y., PARANJPE, S. AND TSIEN, R. Y. (1991). Generation of calcium oscillations in fibroblasts by positive feedback between calcium and IP<sub>3</sub>. *Science* **251**, 75–78.
- HILL, T. D., DEAN, N. M. AND BOYNTON, A. L. (1988). Inositol 1,3,4,5-tetrakisphosphate induces Ca<sup>2+</sup> sequestration in rat liver cells. *Science* **242**, 1176–1178.
- HILLY, M., PIETRI-ROUXEL, F., COQUIL, J.-F., GUY, M. AND MAUGER, J.-P. (1993). Thiol reagents increase the affinity of the inositol 1,4,5-trisphosphate receptor. *J. biol. Chem.* (in press).
- HORNE, W., NORMAN, N., SCHARTZ, D. AND SIMONS, E. (1981). Changes in cytoplasmic pH and membrane potential in thrombin-stimulated human platelets. *Eur. J. Biochem.* **120**, 295–302.
- IINO, M. (1990). Biphasic Ca<sup>2+</sup> dependence of inositol 1,4,5-trisphosphate-induced Ca release in smooth muscle cells of the guinea pig taenia caeci. *J. gen. Physiol.* **95**, 1103–1122.
- IINO, M. (1991). Effects of adenine nucleotides on inositol 1,4,5-trisphosphate-induced calcium release in vascular smooth muscle cells. *J. gen. Physiol.* **98**, 681–698.
- IINO, M. AND ENDO, M. (1992). Calcium-dependent immediate feedback control of inositol 1,4,5-trisphosphate induced Ca<sup>2+</sup> release. *Nature* **360**, 76–78.

- IRVINE, R. F. (1991). Inositol tetrakisphosphate as a second messenger: confusions, contradictions and a potential resolution. *BioEssays* **13**, 419–427.
- IRVINE, R. F., LETCHER, A. J., HESLOP, J. P. AND BERRIDGE, M. J. (1986). The inositol tris/tetrakisphosphate pathway – demonstration of Ins(1,4,5)P<sub>3</sub> 3-kinase activity in animal tissues. *Nature* **320**, 631–634.
- IRVINE, R. F. AND MOOR, R. M. (1986). Micro-injection of inositol 1,3,4,5-tetrakisphosphate activates sea urchin eggs by a mechanism dependent on external Ca<sup>2+</sup>. *Biochem. J.* **240**, 917–920.
- JACOB, R. (1990). Imaging cytoplasmic free calcium in histamine stimulated endothelial cells and in fMet-Leu-Phe stimulated neutrophils. *Cell Calcium* **11**, 241–249.
- JENKINSON, D. H. AND KOLLER, K. (1977). Interactions between the effects of  $\alpha$ - and  $\beta$ -adrenoceptor agonists and adenine nucleotides on the membrane potential of cells in guinea-pig liver slices. *Br. J. Pharmac.* **59**, 163–175.
- JOSEPH, S. K., RICE, H. L. AND WILLIAMSON, J. R. (1989). The effect of external calcium and pH on inositol trisphosphate-mediated calcium release from cerebellum microsomal fractions. *Biochem. J.* **258**, 261–265.
- KALINOSKI, D. L., ALDINGER, S. B., BOYLE, A. G., HUQUE, T., MARECEK, J. F., PRESTWICH, G. D. AND RESTREPO, D. (1992). Characterization of a novel inositol 1,4,5-trisphosphate receptor in isolated olfactory cilia. *Biochem. J.* **281**, 449–456.
- KHAN, A. A., STEINER, J. P., KLEIN, M. G., SCHNEIDER, M. F. AND SNYDER, S. H. (1992). IP<sub>3</sub> receptor: localisation to plasma membrane of T cells and cocapping with the T cell receptor. *Science* **257**, 815–818.
- KUME, S., MUTO, A., ARUGA, J., NAKAGAWA, T., MICHIKAWA, T., FURUICHI, T., NAKADE, S., OKANO, H. AND MIKOSHIBA, K. (1993). The *Xenopus* IP<sub>3</sub> receptor: structure, function and localisation in oocytes and eggs. *Cell* **73**, 555–570.
- KUNO, M. AND GARDNER, P. (1987). Ion channels activated by inositol 1,4,5-trisphosphate in plasma membrane of human T-lymphocytes. *Nature* **326**, 301–304.
- KUSHMERIC, M. J., DILLON, P. F., MEYER, R. A., BROWN, T. R., KRISANDA, J. M. AND SWEENEY, H. L. (1986). <sup>31</sup>P-NMR spectroscopy, chemical analysis and free Mg<sup>2+</sup> of rabbit bladder and uterine smooth muscle. *J. biol. Chem.* **261**, 14420–14429.
- LAI, F. A., ERICKSON, H. P., ROUSSEAU, E., LIU, Q.-Y. AND MEISSNER, G. (1988). Purification and reconstitution of the calcium release channel from skeletal muscle. *Nature* **331**, 315–319.
- LECHLEITER, J., GIRARD, S., PERALTA, E. AND CLAPHAM, D. (1991). Spiral calcium wave propagation and annihilation in *Xenopus laevis* oocytes. *Science* **252**, 123–126.
- LÜCKHOFF, A. AND CLAPHAM, D. E. (1992). Inositol 1,3,4,5-tetrakisphosphate activates an endothelial-Ca<sup>2+</sup> permeable channel. *Nature* **355**, 356–358.
- MAEDA, N., KAWASAKI, T., NAKADE, S., YOKOTA, N., TAGUCHI, T., KASAI, M. AND MIKOSHIBA, K. (1991). Structural and functional characterization of inositol 1,4,5-trisphosphate receptor channel from mouse cerebellum. *J. biol. Chem.* **266**, 1109–1116.
- MAEDA, N., NIIIBE, M. AND MIKOSHIBA, K. (1990). A cerebellar Purkinje cell marker P<sub>400</sub> protein is an inositol 1,4,5-trisphosphate (InsP<sub>3</sub>) receptor protein. Purification and characterization of InsP<sub>3</sub> receptor complex. *EMBO J.* **9**, 61–67.
- MARSHALL, I. C. B. AND TAYLOR, C. W. (1993). Biphasic effects of cytosolic Ca<sup>2+</sup> on Ins(1,4,5)P<sub>3</sub>-stimulated Ca<sup>2+</sup> mobilization in hepatocytes. *J. biol. Chem.* (in press).
- MATTER, N., RITZ, M.-F., FREYERMUTH, S., ROGUE, P. AND MALVIYA, A. N. (1993). Stimulation of nuclear protein kinase C leads to phosphorylation of nuclear inositol 1,4,5-trisphosphate receptor and accelerated calcium release by inositol 1,4,5-trisphosphate from isolated rat liver nuclei. *J. biol. Chem.* **268**, 732–736.
- MEYER, T., WENSEL, T. AND STRYER, L. (1990). Kinetics of calcium channel opening by inositol 1,4,5-trisphosphate. *Biochemistry, N.Y.* **9**, 32–37.
- MIGNERY, G. A., JOHNSTON, P. A., AND SÜDHOF, T. C. (1992). Mechanism of Ca<sup>2+</sup> inhibition of inositol 1,4,5-trisphosphate (InsP<sub>3</sub>) binding to cerebellar InsP<sub>3</sub> receptor. *J. biol. Chem.* **267**, 7450–7455.
- MIGNERY, G. A., NEWTON, C. L., ARCHER, B. T. AND SÜDHOF, T. C. (1990). Structure and expression of the rat inositol 1,4,5-trisphosphate receptor. *J. biol. Chem.* **265**, 12679–12685.
- MIGNERY, G. A. AND SÜDHOF, T. C. (1990). The ligand binding site and transduction mechanism in the inositol-1,4,5-trisphosphate receptor. *EMBO J.* **9**, 3893–3898.
- MIGNERY, G. A., SÜDHOF, T. C., TAKEI, K. AND DE CAMILLI, P. (1989). Putative receptor for inositol 1,4,5-trisphosphate similar to ryanodine receptor. *Nature* **342**, 192–195.

- MISSIAEN, L., TAYLOR, C. W. AND BERRIDGE, M. J. (1991). Spontaneous calcium release from inositol trisphosphate-sensitive calcium stores. *Nature* **352**, 241–244.
- MISSIAEN, L., TAYLOR, C. W. AND BERRIDGE, M. J. (1992). Luminal  $[Ca^{2+}]$  promoting spontaneous  $Ca^{2+}$  release from inositol 1,4,5-trisphosphate-sensitive  $Ca^{2+}$  stores in rat hepatocytes. *J. Physiol., Lond.* **455**, 623–640.
- MIYAWAKI, A., FURUICHI, T., RYOU, Y., YOSHIKAWA, S., NAKAGAWA, T., SAITOH, T. AND MIKOSHIBA, K. (1991). Structure–function relationships of the mouse inositol 1,4,5-trisphosphate receptor. *Proc. natn. Acad. Sci. U.S.A.* **88**, 4911–4915.
- MIYAZAKI, S., YUZAKI, M., NAKADA, K., SHIRAKAWA, H., NAKANISHI, S., NAKADE, S. AND MIKOSHIBA, K. (1992). Block of  $Ca^{2+}$  wave and  $Ca^{2+}$  oscillation by antibody to the inositol 1,4,5-trisphosphate receptor in fertilized hamster eggs. *Science* **257**, 251–255.
- MORRIS, A. P., GALLACHER, D. V., IRVINE, R. F. AND PETERSEN, O. H. (1987). Synergism of inositol trisphosphate and tetrakisphosphate in activating  $Ca^{2+}$ -dependent  $K^+$  channels. *Nature* **330**, 653–655.
- MOUREY, R. J., VERMA, A., SUPATTAPONE, S. AND SNYDER, S. H. (1990). Purification and characterization of the inositol 1,4,5-trisphosphate receptor protein from rat vas deferens. *Biochem. J.* **272**, 383–389.
- MUALLEM, S., PANDOL, S. J. AND BEEKER, T. G. (1989). Hormone-evoked calcium release from intracellular stores is a quantal process. *J. biol. Chem.* **264**, 205–212.
- NAKADE, S., MAEDA, N. AND MIKOSHIBA, K. (1991). Involvement of the C-terminus of the inositol 1,4,5-trisphosphate receptor in  $Ca^{2+}$  release analysed using region specific monoclonal antibodies. *Biochem. J.* **277**, 125–131.
- NAKAGAWA, T., OKANO, H., FURUICHI, T., ARUGA, J. AND MIKOSHIBA, K. (1991). The subtypes of the mouse inositol 1,4,5-trisphosphate receptor are expressed in a tissue specific and developmentally specific manner. *Proc. natn. Acad. Sci. U.S.A.* **88**, 6244–6248.
- NELSON, T. E. AND NELSON, K. E. (1990). Intra- and extraluminal sarcoplasmic reticulum membrane regulatory sites for  $Ca^{2+}$ -induced  $Ca^{2+}$  release. *FEBS Lett.* **263**, 292–294.
- NISHIZUKA, Y. (1988). The molecular heterogeneity of protein kinase C and its implications for cellular regulation. *Nature* **334**, 661–665.
- NUNN, D. L. AND TAYLOR, C. W. (1990). Liver inositol 1,4,5-trisphosphate-binding sites are the  $Ca^{2+}$ -mobilizing receptors. *Biochem. J.* **270**, 227–232.
- ODGEN, D. C., CAPIOD, T., WALKER, J. W. AND TRENTHAM, D. R. (1990). Kinetics of the conductance evoked by noradrenaline, inositol trisphosphate or  $Ca^{2+}$  in guinea-pig isolated hepatocytes. *J. Physiol., Lond.* **422**, 585–602.
- OLDERSHAW, K. A., RICHARDSON, A. AND TAYLOR, C. W. (1992). Prolonged exposure to inositol 1,4,5-trisphosphate does not cause intrinsic desensitization of the intracellular  $Ca^{2+}$ -mobilizing receptor. *J. biol. Chem.* **267**, 16312–16316.
- OLDERSHAW, K. A. AND TAYLOR, C. W. (1993). Luminal  $Ca^{2+}$  increases the affinity of inositol 1,4,5-trisphosphate for its receptor. *Biochem. J.* **292**, 631–633.
- ORON, Y., DASCAL, N., NADLER, E. AND LUPU, M. (1985). Inositol 1,4,5-trisphosphate mimics muscarinic response in *Xenopus* oocytes. *Nature* **313**, 141–143.
- PARKER, I. AND MILEDI, R. (1986). Changes in intracellular  $Ca^{2+}$  and in membrane currents evoked by injection of inositol 1,4,5-trisphosphate in *Xenopus* oocytes. *Proc. R. Soc. Lond. B* **228**, 307–315.
- PARYS, J. B., SERNETT, S. W., DELISLE, S., SNYDER, P. M., WELSH, M. J. AND CAMPBELL, K. P. (1992). Isolation, characterisation and localisation of inositol 1,4,5-trisphosphate receptor protein in *Xenopus laevis* oocytes. *J. biol. Chem.* **267**, 18776–18782.
- PIETRI, F., HILLY, M. AND MAUGER, J.-P. (1990). Calcium mediates the interconversion between two states of the liver inositol 1,4,5-trisphosphate receptor. *J. biol. Chem.* **265**, 17478–17485.
- PUTNEY, J. W. (1986). A model for receptor-regulated calcium entry. *Cell Calcium* **7**, 1–12.
- QUINTON, T. M. AND DEAN, W. L. (1992). Cyclic AMP-dependent phosphorylation of the inositol 1,4,5-trisphosphate receptor inhibits  $Ca^{2+}$  release from platelet membranes. *Biochem. biophys. Res. Commun.* **184**, 893–899.
- RASMUSSEN, H. AND BARRETT, P. Q. (1984). Calcium messenger system: an integrated view. *Physiol. Rev.* **64**, 938–984.
- RICHARDSON, A. AND TAYLOR, C. W. (1993). Effects of  $Ca^{2+}$  chelators on purified inositol 1,4,5-trisphosphate receptors and inositol 1,4,5-trisphosphate stimulated  $Ca^{2+}$  mobilization. *J. biol. Chem.* **268**, 11582–11587.

- ROONEY, T. A., SASS, E. J. AND THOMAS, A. P. (1990). Agonist-induced cytosolic calcium oscillations originate from a specific locus in single hepatocytes. *J. biol. Chem.* **265**, 10792–10796.
- ROSS, C. A., DANOFF, S. K., SCHELL, M. J., SNYDER, S. H. AND ULRICH, A. (1992). Three additional inositol 1,4,5-trisphosphate receptors: molecular cloning and differential localization in brain and peripheral tissues. *Proc. natn. Acad. Sci. U.S.A.* **89**, 4265–4269.
- ROSS, C. A., MELDOLESI, J., MILNER, T. A., SATOH, T., SUPATTAPONE, S. AND SNYDER, S. H. (1989). Inositol 1,4,5-trisphosphate receptor localized to endoplasmic reticulum in cerebellar Purkinje neurons. *Nature* **339**, 468–470.
- SANDERSON, M. J., CHARLES, A. C. AND DIRKSEN, E. R. (1990). Mechanical stimulation and intercellular communication increases intracellular Ca<sup>2+</sup> in epithelial cells. *Cell Regulation* **1**, 585–596.
- SATOH, T., ROSS, G. A., VILLA, A., SUPATTAPONE, S., POZZAN, T., SNYDER, S. H. AND MELDOLESI, J. (1990). The inositol 1,4,5-trisphosphate receptor in cerebellar Purkinje cells. Quantitative immunogold labeling reveals concentration in an endoplasmic reticulum subcompartment. *J. Cell Biol.* **111**, 615–625.
- SAYERS, L. G., BROWN, G. R., MICHELL, R. H. AND MICHELANGELI, F. (1993). The effects of thimerosal on calcium uptake and inositol 1,4,5-trisphosphate-induced calcium release in cerebellar microsomes. *Biochem. J.* **289**, 883–887.
- SHARP, A. H., SNYDER, S. H. AND NIGAM, S. K. (1992). Inositol 1,4,5-trisphosphate receptors: localization in epithelial tissue. *J. biol. Chem.* **267**, 7444–7449.
- SHUTTLEWORTH, T. J. (1992). Calcium release from inositol 1,4,5-trisphosphate-sensitive stores is not modulated by intraluminal Ca<sup>2+</sup>. *J. biol. Chem.* **267**, 3573–3576.
- SMITH, J. B., SMITH, L. AND HIGGINS, B. L. (1985). Temperature and nucleotide dependence of calcium release by myo-inositol 1,4,5-trisphosphate in cultured vascular smooth muscle cells. *J. biol. Chem.* **260**, 14413–14416.
- SORRENTINO, V. AND VOLPE, P. (1993). Ryanodine receptors: how many, where and why? *Trends pharmac. Sci.* **14**, 98–103.
- SPÄT, A., BRADFORD, P. G., MCKINNEY, J. S., RUBIN, R. P. AND PUTNEY, J. W. (1986). A saturable receptor for <sup>32</sup>P-inositol-1,4,5-trisphosphate in hepatocytes and neutrophils. *Nature* **319**, 514–516.
- SPÄT, A., EBERHARDT, I. AND KIESEL, L. (1992). Low concentrations of adenine nucleotides enhance the receptor binding of inositol 1,4,5-trisphosphate. *Biochem. J.* **287**, 335–336.
- STOREY, D. J., SHEARS, S. B., KIRK, C. J. AND MICHELL, R. H. (1984). Stepwise enzymatic dephosphorylation of inositol 1,4,5-trisphosphate to inositol in liver. *Nature* **312**, 374–376.
- STREB, H., IRVINE, R. F., BERRIDGE, M. J. AND SCHULZ, I. (1983). Release of Ca<sup>2+</sup> from a nonmitochondrial intracellular store in pancreatic acinar cells by inositol 1,4,5-trisphosphate. *Nature* **306**, 67–69.
- SÜDHOF, T. C., NEWTON, C. L., ARCHER, B. T., USHKARYOV, Y. A. AND MIGNERY, G. A. (1991). Structure of a novel InsP<sub>3</sub> receptor. *EMBO J.* **10**, 3199–3206.
- SUEMATSU, E., HIRATA, M., SASAGURI, T., HASHIMOTO, T. AND KURIYAMA, H. (1985). Roles of Ca<sup>2+</sup> on the inositol 1,4,5-trisphosphate-induced release of Ca<sup>2+</sup> from saponin-permeabilized single cells of the porcine coronary artery. *Comp. Biochem. Physiol.* **82A**, 645–649.
- SUPATTAPONE, S., DANOFF, S. K., THEIBERT, A., JOSEPH, S. K., STEINER, J. AND SNYDER, S. H. (1988a). Cyclic AMP-dependent phosphorylation of brain inositol trisphosphate receptor decreases its release of calcium. *Proc. natn. Acad. Sci. U.S.A.* **85**, 8747–8750.
- SUPATTAPONE, S., WORLEY, P. F., BARABAN, J. M. AND SNYDER, S. H. (1988b). Solubilization, purification and characterization of an inositol trisphosphate receptor. *J. biol. Chem.* **263**, 1530–1534.
- SWANN, K. (1991). Thimerosal enhances calcium-induced calcium release in unfertilized hamster eggs. *FEBS Lett.* **278**, 175–178.
- TAKESHIMA, H., NISHIMURA, S., MATSUMOTO, T., ISHIDA, H., KANGAWA, K., MINAMINO, N., MATSUO, H., UEDA, M., HANOAKA, M., HIROSE, T. AND NUMA, S. (1989). Primary structure and expression from complementary DNA of skeletal muscle ryanodine receptor. *Nature* **339**, 439–445.
- TAYLOR, C. W. AND POTTER, B. V. L. (1990). The size of the inositol 1,4,5-trisphosphate-sensitive Ca<sup>2+</sup> stores depends on inositol 1,4,5-trisphosphate concentration. *Biochem. J.* **266**, 189–194.
- TAYLOR, C. W. AND RICHARDSON, A. (1991). Structure and function of inositol trisphosphate receptors. *Pharmac. Ther.* **51**, 97–137.
- THEIBERT, A. B., SUPATTAPONE, S., WORLEY, P. F., BARABAN, J. M., MEEK, J. L. AND SNYDER, S. H. (1987). Demonstration of inositol 1,3,4,5-tetrakisphosphate receptor binding. *Biochem. biophys. Res. Commun.* **148**, 1283–1289.

- THORN, P. (1993). Spatial effects of  $\text{Ca}^{2+}$  signalling in pancreatic acinar cells. *J. exp. Biol.* **184**, 129–144.
- TSE, A., TSE, F. W., ALMERS, W. AND HILLE, B. (1993). Rhythmic exocytosis stimulated by GnRH-induced calcium oscillations in rat gonadotropes. *Science* **260**, 82–84.
- UNWIN, N. (1989). The structure of ion channels in membranes of excitable cells *Neuron* **3**, 665–676.
- VARNEY, M. A., RIVERA, J., LOPEZ-BERNAL, A. AND WATSON, S. P. (1990). Are there subtypes of the inositol 1,4,5-trisphosphate receptor? *Biochem. J.* **269**, 211–216.
- VOLPE, P., ALDERSON-LANG, B. H. AND NICKOLS, G. A. (1990). Regulation of inositol 1,4,5-trisphosphate-induced  $\text{Ca}^{2+}$  release. I. Effect of  $\text{Mg}^{2+}$ . *Am. J. Physiol.* **258**, C1077–C1085.
- WAKUI, M., POTTER, B. V. L. AND PETERSEN, O. H. (1989). Pulsatile intracellular calcium release does not depend on fluctuations in inositol trisphosphate concentration. *Nature* **339**, 317–320.
- WALAAS, S. I., NAIRN, A. C. AND GREENGARD, P. I. (1986). PCPP-260, a Purkinje cell-specific cyclic AMP-regulated membrane phosphoprotein of *M.* 260000. *J. Neurosci.* **6**, 954–961.
- WATRAS, J., BEZPROZVANNY, I. AND EHRLICH, B. E. (1991). Inositol 1,4,5-trisphosphate-gated channels in cerebellum: presence of multiple conductance states *J. Neurosci.* **11**, 3239–3245.
- WHITE, A. M., VARNEY, M. A., WATSON, S. P., RIGBY, S., CHANGSHENG, L., WARD, J. G., REESE, C. B., GRAHAM, H. C. AND WILLIAMS, R. J. P. (1991). Influence of  $\text{Mg}^{2+}$  and pH on n.m.r. spectra and radioligand binding of inositol 1,4,5-trisphosphate. *Biochem. J.* **278**, 759–764.
- WILLCOCKS, A. L., COOKE, A. M., POTTER, B. V. L. AND NAHORSKI, S. R. (1987). Stereospecific recognition sites for [ $^3\text{H}$ ]inositol 1,4,5-trisphosphate in particulate preparations of rat cerebellum. *Biochem. biophys. Res. Commun.* **146**, 1071–1078.
- WILLEMS, P. H. G. M., DE JONG, M. D., DE PONT, J. J. H. H. M. AND VAN OS, C. H. (1990).  $\text{Ca}^{2+}$ -sensitivity of inositol 1,4,5-trisphosphate-mediated  $\text{Ca}^{2+}$  release in permeabilized pancreatic acinar cells. *Biochem. J.* **265**, 681–687.
- WORLEY, P. F., BARABAN, J. M. AND SNYDER, S. H. (1989). Inositol 1,4,5-trisphosphate receptor binding: autoradiographic localization in rat brain. *J. Neurosci.* **9**, 339–346.
- WORLEY, P. F., BARABAN, J. M., SUPATTAPONE, S., WILSON, V. S. AND SNYDER, S. H. (1987). Characterization of inositol trisphosphate receptor binding in brain: Regulation by pH and  $\text{Ca}^{2+}$ . *J. Biol. Chem.* **262**, 12132–12136.
- YAMAMOTO, H., MAEDA, N., NIINOBE, M., MIYAMOTO, E. AND MIKOSHIBA, K. (1989). Phosphorylation of P400 protein by cyclic AMP-dependent protein kinase and  $\text{Ca}^{2+}$ /calmodulin-dependent protein kinase II. *J. Neurochem.* **53**, 917–923.
- YOSHIKAWA, S., TANIMURA, T., MIYAWAKI, A., NAKAMURA, M., YUZAKI, M., FURUICHI, T. AND MIKOSHIBA, K. (1992). Molecular cloning and characterization of the inositol 1,4,5-trisphosphate receptor in *Drosophila melanogaster* *J. Biol. Chem.* **267**, 16613–16619.
- ZHANG, B.-X., ZHAO, H., LOESSBERG, P. A. AND MUALLEM, S. (1992). Regulation of agonist-evoked  $[\text{Ca}^{2+}]_i$  oscillation by intracellular  $\text{Ca}^{2+}$  and  $\text{Ba}^{2+}$  in AR42J cells. *Am. J. Physiol.* **262**, C1125–C1133.
- ZHAO, H. AND MUALLEM, S. (1990). Inhibition of inositol 1,4,5-trisphosphate-mediated  $\text{Ca}^{2+}$  release by  $\text{Ca}^{2+}$  in cells from peripheral tissues. *J. Biol. Chem.* **265**, 21419–21422.
